# Supplementary material for: Evolución de la renta agraria en España y en la UE-15, desde 1993 hasta 2011
Source: Royal Society of Chemistry journal article supplement (doi:10.1039/d3fo05756a), 2012-01-01
Supplement: d3fo05756a1.zip [file d3fo05756a1.zip]

**Supplemental Table 4. The negative results of MR study between intake of artificial sweetener added to cereal and cancers.**

| Type of cancer |                            | GWAS ID                        | Inverse variance weighted |          |           |         |         |       | Heterogeneity |         | Pleio              |         |
|----------------|----------------------------|--------------------------------|---------------------------|----------|-----------|---------|---------|-------|---------------|---------|--------------------|---------|
|                |                            |                                | Odds ratio                | CI lower | CI upper  | p-value | $\beta$ | SE    | Q-value       | p-value | MR Egger-intercept | p-value |
| Lung cancer    | Squamous cell lung cancer  | finn-b-C3_NSCLC_SQUAM_EXALLC   | 1.862                     | 0.055    | 62.852    | 0.729   | 0.622   | 1.795 | 8.764         | 0.890   | -0.074             | 0.211   |
|                | Squamous cell lung cancer  | finn-b-C3_NSCLC_SQUAM          | 1.763                     | 0.053    | 58.828    | 0.751   | 0.567   | 1.789 | 8.406         | 0.906   | -0.069             | 0.242   |
|                | Squamous cell lung cancer  | ieu-a-967                      | 1.006                     | 0.120    | 8.409     | 0.995   | 0.006   | 1.083 | 42.529        | 0.000   | -0.025             | 0.472   |
|                | Small cell lung cancer     | finn-b-C3_SCLC_EXALLC          | 423.351                   | 2.378    | 75369.997 | 0.022   | 6.048   | 2.644 | 16.756        | 0.334   | 0.050              | 0.569   |
|                | Small cell lung cancer     | finn-b-C3_SCLC                 | 396.090                   | 2.141    | 73263.234 | 0.025   | 5.982   | 2.663 | 17.097        | 0.313   | 0.048              | 0.582   |
|                | Non-small cell lung cancer | finn-b-C3_LUNG_NONSMALL        | 3.181                     | 0.592    | 17.090    | 0.177   | 1.157   | 0.858 | 6.839         | 0.962   | 0.015              | 0.591   |
|                | Non-small cell lung cancer | finn-b-C3_LUNG_NONSMALL_EXALLC | 3.684                     | 0.676    | 20.065    | 0.132   | 1.304   | 0.865 | 7.055         | 0.956   | 0.016              | 0.566   |

|             |                                         |                              |       |       |         |       |       |       |        |       |        |       |
|-------------|-----------------------------------------|------------------------------|-------|-------|---------|-------|-------|-------|--------|-------|--------|-------|
| Lung cancer | Lung cancer and mesothelioma            | ukb-d-LUNG_CANCER_ME SOT     | 1.004 | 0.995 | 1.014   | 0.373 | 0.004 | 0.005 | 18.027 | 0.322 | 0.000  | 0.339 |
|             | Lung cancer                             | ieu-b-4954                   | 1.004 | 0.990 | 1.019   | 0.573 | 0.004 | 0.007 | 32.272 | 0.006 | 0.000  | 0.445 |
|             | Lung cancer                             | ieu-a-966                    | 2.137 | 0.754 | 6.054   | 0.153 | 0.759 | 0.531 | 24.294 | 0.083 | -0.002 | 0.895 |
|             | Lung cancer                             | ieu-b-4955                   | 1.004 | 0.990 | 1.019   | 0.577 | 0.004 | 0.007 | 32.322 | 0.006 | 0.000  | 0.437 |
|             | lung adenocarcinoma                     | finn-b-C3_NSCLC_ADENO_EXALLC | 5.999 | 0.352 | 102.198 | 0.216 | 1.792 | 1.447 | 13.552 | 0.560 | 0.064  | 0.180 |
|             | Lung adenocarcinoma                     | ieu-a-965                    | 2.203 | 0.582 | 8.347   | 0.245 | 0.790 | 0.680 | 9.770  | 0.878 | -0.024 | 0.278 |
|             | lung adenocarcinoma                     | finn-b-C3_NSCLC_ADENO        | 5.033 | 0.298 | 84.968  | 0.262 | 1.616 | 1.442 | 13.579 | 0.558 | 0.063  | 0.186 |
|             | Malignant neoplasm of bronchus and lung | ukb-d-C3_BRONCHUS_LU NG      | 1.004 | 0.995 | 1.013   | 0.368 | 0.004 | 0.005 | 18.253 | 0.309 | 0.000  | 0.135 |
|             | Lung cancer                             | ieu-a-987                    | 1.478 | 1.001 | 2.181   | 0.049 | 0.390 | 0.199 | 14.310 | 0.999 | 0.002  | 0.801 |
|             | Lung adenocarcinoma                     | ieu-a-984                    | 1.217 | 0.715 | 2.069   | 0.469 | 0.196 | 0.271 | 26.474 | 0.818 | -0.004 | 0.647 |
|             | Squamous cell lung cancer               | ieu-a-989                    | 2.060 | 1.089 | 3.895   | 0.026 | 0.723 | 0.325 | 34.177 | 0.459 | -0.019 | 0.072 |

|                                                      |                                                      |                             |       |       |       |       |        |       |        |       |        |       |
|------------------------------------------------------|------------------------------------------------------|-----------------------------|-------|-------|-------|-------|--------|-------|--------|-------|--------|-------|
| Colorectal cancer                                    | Colorectal cancer                                    | ieu-b-4965                  | 0.999 | 0.983 | 1.015 | 0.888 | -0.001 | 0.008 | 20.444 | 0.156 | 0.000  | 0.683 |
|                                                      | Colorectal cancer                                    | finn-b-C3_COLORECTAL_EXALLC | 1.040 | 0.292 | 3.709 | 0.951 | 0.040  | 0.649 | 9.319  | 0.860 | 0.007  | 0.750 |
|                                                      | Colon adenocarcinoma                                 | finn-b-C3_COLON_ADENOXALLC  | 0.698 | 0.112 | 4.357 | 0.701 | -0.359 | 0.934 | 12.539 | 0.638 | 0.017  | 0.580 |
|                                                      | Malignant neoplasm of colon                          | finn-b-C3_COLON_EXALLC      | 0.462 | 0.092 | 2.316 | 0.348 | -0.771 | 0.822 | 12.723 | 0.624 | 0.023  | 0.397 |
| Malignant neoplasm of stomach (all cancers excluded) | Malignant neoplasm of stomach (all cancers excluded) | finn-b-C3_STOMACH_EXALLC    | 0.539 | 0.037 | 7.882 | 0.652 | -0.618 | 1.369 | 14.420 | 0.494 | 0.040  | 0.364 |
| Breast cancer                                        | Breast cancer                                        | ebi-a-GCST004988            | 0.839 | 0.626 | 1.125 | 0.241 | -0.175 | 0.149 | 12.575 | 0.764 | 0.002  | 0.751 |
|                                                      | Breast cancer                                        | ieu-a-1126                  | 0.831 | 0.615 | 1.124 | 0.229 | -0.185 | 0.154 | 12.541 | 0.706 | 0.001  | 0.794 |
|                                                      | Breast cancer                                        | ieu-a-1131                  | 0.584 | 0.241 | 1.416 | 0.234 | -0.538 | 0.452 | 15.052 | 0.521 | 0.007  | 0.654 |
|                                                      | Breast cancer                                        | ieu-a-1168                  | 0.765 | 0.384 | 1.526 | 0.447 | -0.268 | 0.352 | 28.533 | 0.039 | 0.003  | 0.797 |
|                                                      | Breast cancer                                        | ieu-a-1130                  | 0.768 | 0.425 | 1.386 | 0.380 | -0.264 | 0.301 | 21.632 | 0.155 | -0.007 | 0.478 |

|               |                   |            |       |       |        |       |        |       |        |       |        |       |
|---------------|-------------------|------------|-------|-------|--------|-------|--------|-------|--------|-------|--------|-------|
| Breast cancer | Breast cancer     | ieu-a-1129 | 0.946 | 0.598 | 1.496  | 0.812 | -0.056 | 0.234 | 20.367 | 0.204 | 0.006  | 0.422 |
|               | Breast cancer     | ieu-a-1165 | 2.087 | 0.421 | 10.348 | 0.368 | 0.736  | 0.817 | 19.015 | 0.213 | 0.005  | 0.848 |
|               | Breast cancer     | ukb-a-55   | 0.982 | 0.965 | 1.000  | 0.046 | -0.018 | 0.009 | 15.259 | 0.506 | 0.000  | 0.494 |
|               | ER- Breast cancer | ieu-a-1128 | 0.822 | 0.421 | 1.605  | 0.566 | -0.196 | 0.341 | 24.525 | 0.079 | -0.007 | 0.560 |
|               | ER- Breast cancer | ieu-a-1137 | 0.191 | 0.045 | 0.807  | 0.024 | -1.654 | 0.734 | 12.630 | 0.700 | 0.017  | 0.484 |
|               | ER- Breast cancer | ieu-a-1166 | 0.562 | 0.118 | 2.684  | 0.470 | -0.576 | 0.798 | 37.202 | 0.003 | -0.017 | 0.509 |
|               | ER- Breast cancer | ieu-a-1136 | 0.726 | 0.239 | 2.207  | 0.573 | -0.320 | 0.567 | 18.632 | 0.288 | -0.023 | 0.192 |
|               | ER- Breast cancer | ieu-a-1135 | 1.290 | 0.589 | 2.825  | 0.525 | 0.255  | 0.400 | 19.060 | 0.266 | 0.000  | 0.978 |
|               | ER- Breast cancer | ieu-a-1163 | 1.777 | 0.107 | 29.503 | 0.688 | 0.575  | 1.433 | 17.485 | 0.291 | -0.046 | 0.321 |
|               | ER+ Breast cancer | ieu-a-1127 | 0.988 | 0.690 | 1.414  | 0.946 | -0.012 | 0.183 | 11.406 | 0.784 | -0.001 | 0.920 |
|               | ER+ Breast cancer | ieu-a-1134 | 0.630 | 0.103 | 3.861  | 0.618 | -0.461 | 0.925 | 19.388 | 0.249 | -0.019 | 0.525 |

|                |                                                               |            |       |       |        |       |        |       |        |       |        |       |
|----------------|---------------------------------------------------------------|------------|-------|-------|--------|-------|--------|-------|--------|-------|--------|-------|
| Breast cancer  | ER+ Breast cancer                                             | ieu-a-1167 | 1.028 | 0.503 | 2.104  | 0.939 | 0.028  | 0.365 | 20.436 | 0.253 | 0.011  | 0.337 |
|                | ER+ Breast cancer                                             | ieu-a-1133 | 0.987 | 0.516 | 1.888  | 0.969 | -0.013 | 0.331 | 18.475 | 0.297 | -0.009 | 0.382 |
|                | ER+ Breast cancer                                             | ieu-a-1132 | 1.022 | 0.621 | 1.681  | 0.932 | 0.022  | 0.254 | 19.047 | 0.266 | 0.007  | 0.440 |
|                | ER+ Breast cancer                                             | ieu-a-1164 | 4.339 | 0.373 | 50.428 | 0.241 | 1.468  | 1.251 | 17.988 | 0.263 | 0.050  | 0.211 |
| Ovarian cancer | Serous ovarian cancer: low malignant potential                | ieu-a-1230 | 0.403 | 0.079 | 2.051  | 0.273 | -0.909 | 0.830 | 13.023 | 0.671 | 0.007  | 0.796 |
|                | Serous ovarian cancer: low grade and low malignant potential  | ieu-a-1229 | 0.458 | 0.096 | 2.190  | 0.328 | -0.781 | 0.798 | 21.716 | 0.153 | 0.025  | 0.352 |
|                | Ovarian cancer                                                | ieu-b-4963 | 1.011 | 0.998 | 1.024  | 0.102 | 0.011  | 0.007 | 8.614  | 0.855 | 0.000  | 0.715 |
|                | Ovarian cancer                                                | ieu-a-1120 | 1.044 | 0.563 | 1.936  | 0.892 | 0.043  | 0.315 | 12.358 | 0.719 | 0.003  | 0.753 |
|                | Mucinous ovarian cancer: invasive and low malignant potential | ieu-a-1231 | 0.777 | 0.191 | 3.165  | 0.725 | -0.252 | 0.716 | 7.877  | 0.952 | 0.000  | 0.991 |
|                | Low malignant potential ovarian cancer                        | ieu-a-1233 | 0.562 | 0.150 | 2.109  | 0.393 | -0.577 | 0.675 | 11.791 | 0.758 | -0.008 | 0.732 |
|                | Low malignant potential mucinous ovarian cancer               | ieu-a-1232 | 1.099 | 0.139 | 8.673  | 0.928 | 0.095  | 1.054 | 10.708 | 0.827 | -0.026 | 0.455 |

|                |                                                |            |        |       |          |       |        |       |        |       |        |       |
|----------------|------------------------------------------------|------------|--------|-------|----------|-------|--------|-------|--------|-------|--------|-------|
| Ovarian cancer | Low grade serous ovarian cancer                | ieu-a-1122 | 0.912  | 0.048 | 17.200   | 0.951 | -0.092 | 1.498 | 25.762 | 0.057 | 0.064  | 0.185 |
|                | Invasive mucinous ovarian cancer               | ieu-a-1123 | 0.625  | 0.098 | 3.989    | 0.619 | -0.470 | 0.946 | 10.052 | 0.864 | 0.017  | 0.593 |
|                | High grade serous ovarian cancer               | ieu-a-1121 | 0.879  | 0.411 | 1.878    | 0.739 | -0.129 | 0.387 | 17.898 | 0.330 | -0.007 | 0.605 |
|                | High grade and low grade serous ovarian cancer | ieu-a-1228 | 0.852  | 0.383 | 1.892    | 0.694 | -0.160 | 0.407 | 21.240 | 0.169 | -0.002 | 0.884 |
|                | Endometrioid ovarian cancer                    | ieu-a-1125 | 1.315  | 0.250 | 6.926    | 0.746 | 0.274  | 0.848 | 25.994 | 0.054 | 0.011  | 0.705 |
|                | Clear cell ovarian cancer                      | ieu-a-1124 | 1.198  | 0.185 | 7.758    | 0.850 | 0.180  | 0.953 | 14.088 | 0.592 | -0.002 | 0.941 |
|                | Oral and oropharyngeal cancer                  | ieu-b-4962 | 0.999  | 0.993 | 1.005    | 0.778 | -0.001 | 0.003 | 7.249  | 0.841 | 0.000  | 0.875 |
|                | Oral cavity and pharyngeal cancer              | ieu-b-89   | 0.385  | 0.029 | 5.155    | 0.471 | -0.956 | 1.324 | 13.434 | 0.338 | -0.014 | 0.747 |
|                | Oral cavity and pharyngeal cancer              | ieu-b-90   | 0.579  | 0.042 | 8.028    | 0.683 | -0.547 | 1.342 | 13.035 | 0.366 | -0.009 | 0.841 |
|                | Oral cavity and pharyngeal cancer              | ieu-b-91   | 21.339 | 0.078 | 5863.666 | 0.285 | 3.061  | 2.865 | 15.795 | 0.201 | 0.074  | 0.443 |
|                | Oral cavity cancer                             | ieu-b-93   | 0.207  | 0.008 | 5.559    | 0.349 | -1.573 | 1.678 | 13.008 | 0.368 | -0.040 | 0.475 |

|                      |                                                                            |                                            |        |       |            |       |        |       |        |       |        |       |
|----------------------|----------------------------------------------------------------------------|--------------------------------------------|--------|-------|------------|-------|--------|-------|--------|-------|--------|-------|
| Ovarian cancer       | Oral cavity cancer                                                         | ieu-b-94                                   | 0.516  | 0.023 | 11.487     | 0.676 | -0.662 | 1.583 | 11.607 | 0.478 | -0.020 | 0.698 |
|                      | Oral cavity cancer                                                         | ieu-b-95                                   | 37.370 | 0.081 | 17219.940  | 0.247 | 3.621  | 3.129 | 12.855 | 0.380 | 0.091  | 0.392 |
|                      | Oropharyngeal cancer                                                       | ieu-b-96                                   | 0.453  | 0.016 | 13.233     | 0.646 | -0.792 | 1.722 | 12.051 | 0.442 | -0.020 | 0.727 |
|                      | Oropharyngeal cancer                                                       | ieu-b-97                                   | 1.823  | 0.067 | 49.810     | 0.722 | 0.600  | 1.688 | 8.828  | 0.718 | 0.038  | 0.498 |
|                      | Oropharyngeal cancer                                                       | ieu-b-98                                   | 6.403  | 0.000 | 126014.127 | 0.713 | 1.857  | 5.045 | 22.805 | 0.029 | 0.108  | 0.521 |
| Kidney cancer        | "Malignant neoplasm of kidney, except renal pelvis" (all cancers excluded) | finn-b-C3_KIDNEY_NOTRE<br>NALPELVIS_EXALLC | 4.412  | 0.496 | 39.230     | 0.183 | 1.484  | 1.115 | 10.999 | 0.753 | -0.056 | 0.130 |
|                      | Malignant neoplasm of kidney, except renal pelvis                          | finn-b-C3_KIDNEY_NOTRE<br>NALPELVIS        | 3.799  | 0.433 | 33.295     | 0.228 | 1.335  | 1.108 | 10.783 | 0.768 | -0.058 | 0.119 |
|                      | Benign neoplasm: Kidney                                                    | finn-b-CD2_BENIGN_KIDNEY                   | 0.378  | 0.007 | 19.822     | 0.630 | -0.972 | 2.020 | 19.604 | 0.188 | -0.075 | 0.249 |
|                      | Benign neoplasm: Kidney (all cancers excluded)                             | finn-b-CD2_BENIGN_KIDNEY_EXALLC            | 0.455  | 0.009 | 22.258     | 0.691 | -0.788 | 1.985 | 18.972 | 0.215 | -0.071 | 0.267 |
| Head and neck cancer | Head and neck cancer                                                       | ieu-b-4912                                 | 0.998  | 0.991 | 1.005      | 0.626 | -0.002 | 0.004 | 6.751  | 0.915 | 0.000  | 0.602 |

|                    |                                                 |                           |       |       |       |       |        |       |        |       |        |       |
|--------------------|-------------------------------------------------|---------------------------|-------|-------|-------|-------|--------|-------|--------|-------|--------|-------|
| Prostate cancer    | Prostate cancer                                 | ieu-b-4809                | 1.000 | 0.960 | 1.042 | 0.998 | 0.000  | 0.021 | 18.371 | 0.244 | -0.001 | 0.280 |
|                    | Prostate cancer                                 | ieu-b-85                  | 0.988 | 0.635 | 1.537 | 0.957 | -0.012 | 0.226 | 16.193 | 0.369 | 0.003  | 0.653 |
|                    | Prostate cancer                                 | ukb-d-C3_PROSTATE         | 1.003 | 0.986 | 1.021 | 0.709 | 0.003  | 0.009 | 22.168 | 0.138 | 0.000  | 0.521 |
|                    | Prostate cancer                                 | finn-b-C3_PROSTATE_EXALLC | 0.882 | 0.314 | 2.480 | 0.812 | -0.126 | 0.527 | 13.662 | 0.551 | -0.029 | 0.090 |
| Oesophageal cancer | Oesophageal cancer                              | ieu-b-4960                | 1.002 | 0.996 | 1.008 | 0.557 | 0.002  | 0.003 | 7.069  | 0.793 | 0.000  | 0.620 |
| Endometrial cancer | Endometrial cancer                              | ebi-a-GCST006464          | 1.199 | 0.533 | 2.700 | 0.661 | 0.182  | 0.414 | 19.251 | 0.203 | -0.006 | 0.671 |
|                    | Endometrial cancer (endometrioid histology)     | ebi-a-GCST006465          | 1.366 | 0.478 | 3.899 | 0.561 | 0.312  | 0.535 | 22.984 | 0.084 | -0.011 | 0.536 |
|                    | Endometrial cancer (Non-endometrioid histology) | ebi-a-GCST006466          | 0.470 | 0.026 | 8.593 | 0.610 | -0.755 | 1.483 | 23.306 | 0.038 | -0.031 | 0.536 |
