# Supplementary material for: Evolución de la renta agraria en España y en la UE-15, desde 1993 hasta 2011
Source: Royal Society of Chemistry journal article supplement (doi:10.1039/d3fo05756a), 2012-01-01
Supplement: d3fo05756a1.zip [file d3fo05756a1.zip]

**Supplemental Table 5. The negative results of MR study between intake of artificial sweetener added to coffee and cancers.**

|             | Type of cancer               | GWAS ID                        | Inverse variance weighted |          |          |         |         |       | Heterogeneity |         | Pleio             |         |
|-------------|------------------------------|--------------------------------|---------------------------|----------|----------|---------|---------|-------|---------------|---------|-------------------|---------|
|             |                              |                                | Odds ratio                | CI lower | CI upper | p-value | $\beta$ | SE    | Q-value       | p-value | MR Egger-intercep | p-value |
| Lung cancer | Squamous cell lung cancer    | finn-b-C3_NSCLC_SQUAM_EXALLC   | 1.244                     | 0.132    | 11.742   | 0.849   | 0.218   | 1.145 | 6.126         | 0.805   | -0.106            | 0.141   |
|             | Squamous cell lung cancer    | finn-b-C3_NSCLC_SQUAM          | 1.340                     | 0.142    | 12.617   | 0.798   | 0.293   | 1.144 | 6.000         | 0.815   | -0.105            | 0.146   |
|             | Squamous cell lung cancer    | ieu-a-967                      | 1.374                     | 0.333    | 5.679    | 0.660   | 0.318   | 0.724 | 17.008        | 0.017   | 0.015             | 0.751   |
|             | Small cell lung cancer       | finn-b-C3_SCLC_EXALLC          | 0.605                     | 0.025    | 14.797   | 0.758   | -0.502  | 1.631 | 6.543         | 0.768   | 0.008             | 0.934   |
|             | Small cell lung cancer       | finn-b-C3_SCLC                 | 0.641                     | 0.026    | 15.661   | 0.785   | -0.445  | 1.631 | 6.622         | 0.761   | 0.007             | 0.942   |
|             | Non-small cell lung cancer   | finn-b-C3_LUNG_NONSMALL        | 0.935                     | 0.319    | 2.745    | 0.903   | -0.067  | 0.549 | 4.022         | 0.946   | -0.020            | 0.546   |
|             | Non-small cell lung cancer   | finn-b-C3_LUNG_NONSMALL_EXALLC | 0.913                     | 0.309    | 2.696    | 0.870   | -0.091  | 0.552 | 3.374         | 0.971   | -0.020            | 0.543   |
|             | Lung cancer and mesothelioma | ukb-d-LUNG_CANCER_MESOT        | 0.997                     | 0.991    | 1.004    | 0.418   | -0.003  | 0.003 | 14.295        | 0.160   | 0.000             | 0.461   |

|             |                                         |                              |       |       |        |       |        |       |        |       |        |       |
|-------------|-----------------------------------------|------------------------------|-------|-------|--------|-------|--------|-------|--------|-------|--------|-------|
| Lung cancer | Lung cancer                             | ieu-b-4954                   | 0.999 | 0.992 | 1.006  | 0.738 | -0.001 | 0.003 | 2.230  | 0.973 | 0.000  | 0.511 |
|             | Lung cancer                             | ieu-a-966                    | 0.768 | 0.404 | 1.459  | 0.421 | -0.264 | 0.327 | 7.142  | 0.414 | 0.009  | 0.653 |
|             | Lung cancer                             | ieu-b-4955                   | 0.999 | 0.992 | 1.006  | 0.754 | -0.001 | 0.003 | 2.359  | 0.968 | 0.000  | 0.528 |
|             | lung adenocarcinoma                     | finn-b-C3_NSCLC_ADENO_EXALLC | 2.351 | 0.385 | 14.341 | 0.354 | 0.855  | 0.923 | 12.753 | 0.238 | -0.064 | 0.262 |
|             | Lung adenocarcinoma                     | ieu-a-965                    | 0.598 | 0.223 | 1.604  | 0.307 | -0.514 | 0.503 | 2.574  | 0.921 | -0.016 | 0.630 |
|             | lung adenocarcinoma                     | finn-b-C3_NSCLC_ADENO        | 2.455 | 0.402 | 14.979 | 0.330 | 0.898  | 0.923 | 6.481  | 0.773 | -0.063 | 0.266 |
|             | Malignant neoplasm of bronchus and lung | ukb-d-C3_BRONCHUS_LUNG       | 0.996 | 0.990 | 1.002  | 0.150 | -0.004 | 0.003 | 9.460  | 0.305 | 0.000  | 0.567 |
|             | Lung cancer                             | ieu-a-987                    | 0.830 | 0.618 | 1.115  | 0.215 | -0.187 | 0.151 | 7.472  | 0.991 | 0.018  | 0.076 |
|             | Lung adenocarcinoma                     | ieu-a-984                    | 0.768 | 0.496 | 1.191  | 0.238 | -0.264 | 0.223 | 19.498 | 0.301 | -0.002 | 0.905 |

|                                                             |                                                      |                              |       |       |       |       |        |       |        |       |        |       |
|-------------------------------------------------------------|------------------------------------------------------|------------------------------|-------|-------|-------|-------|--------|-------|--------|-------|--------|-------|
| <b>Lung cancer</b>                                          | Squamous cell lung cancer                            | ieu-a-989                    | 1.358 | 0.822 | 2.243 | 0.232 | 0.306  | 0.256 | 19.407 | 0.306 | 0.001  | 0.959 |
| <b>Colorectal cancer</b>                                    | Colorectal cancer                                    | ieu-b-4965                   | 1.009 | 0.999 | 1.019 | 0.077 | 0.009  | 0.005 | 3.393  | 0.907 | 0.000  | 0.968 |
|                                                             | Colon adenocarcinoma                                 | finn-b-C3_COLON_ADENO_EXALLC | 1.252 | 0.312 | 5.027 | 0.751 | 0.225  | 0.709 | 12.753 | 0.238 | -0.059 | 0.164 |
|                                                             | Malignant neoplasm of colon                          | finn-b-C3_COLON_EXALLC       | 0.829 | 0.296 | 2.318 | 0.721 | -0.187 | 0.525 | 7.686  | 0.659 | -0.042 | 0.199 |
| <b>Malignant neoplasm of stomach (all cancers excluded)</b> | Malignant neoplasm of stomach (all cancers excluded) | finn-b-C3_STOMACH_EXALLC     | 0.916 | 0.165 | 5.085 | 0.920 | -0.087 | 0.874 | 2.221  | 0.994 | -0.018 | 0.730 |
| <b>Breast cancer</b>                                        | Breast cancer                                        | ieu-b-4810                   | 1.001 | 0.983 | 1.020 | 0.906 | 0.001  | 0.009 | 15.923 | 0.598 | 0.000  | 0.480 |
|                                                             | Breast cancer                                        | ebi-a-GCST004988             | 0.956 | 0.771 | 1.185 | 0.681 | -0.045 | 0.110 | 8.447  | 0.585 | 0.004  | 0.610 |
|                                                             | Breast cancer                                        | ebi-a-GCST007236             | 0.068 | 0.000 | 29372 | 0.684 | -2.694 | 6.623 | 14589  | 0.000 | -0.223 | 0.632 |
|                                                             | Breast cancer                                        | ieu-a-1126                   | 0.864 | 0.665 | 1.124 | 0.276 | -0.146 | 0.134 | 6.802  | 0.558 | 0.001  | 0.903 |

|                      |                   |            |       |       |       |       |        |       |        |       |        |       |
|----------------------|-------------------|------------|-------|-------|-------|-------|--------|-------|--------|-------|--------|-------|
| <b>Breast cancer</b> | Breast cancer     | ieu-a-1131 | 0.478 | 0.202 | 1.133 | 0.094 | -0.738 | 0.440 | 7.070  | 0.529 | 0.007  | 0.778 |
|                      | Breast cancer     | ieu-a-1168 | 0.979 | 0.679 | 1.411 | 0.908 | -0.022 | 0.187 | 7.892  | 0.639 | -0.024 | 0.074 |
|                      | Breast cancer     | ieu-a-1130 | 0.912 | 0.588 | 1.413 | 0.679 | -0.093 | 0.224 | 8.792  | 0.360 | -0.001 | 0.950 |
|                      | Breast cancer     | ieu-a-1129 | 0.922 | 0.647 | 1.315 | 0.654 | -0.081 | 0.181 | 7.321  | 0.502 | 0.003  | 0.769 |
|                      | Breast cancer     | ieu-a-1165 | 1.630 | 0.535 | 4.965 | 0.390 | 0.488  | 0.568 | 12.689 | 0.177 | -0.024 | 0.544 |
|                      | Breast cancer     | ukb-a-55   | 0.992 | 0.979 | 1.004 | 0.177 | -0.008 | 0.006 | 12.693 | 0.241 | 0.000  | 0.960 |
|                      | ER- Breast cancer | ieu-a-1128 | 1.144 | 0.709 | 1.845 | 0.583 | 0.134  | 0.244 | 3.187  | 0.922 | -0.009 | 0.523 |
|                      | ER- Breast cancer | ieu-a-1137 | 0.337 | 0.078 | 1.466 | 0.147 | -1.086 | 0.749 | 8.962  | 0.346 | 0.033  | 0.450 |
|                      | ER- Breast cancer | ieu-a-1166 | 0.944 | 0.456 | 1.955 | 0.876 | -0.058 | 0.372 | 9.144  | 0.518 | -0.042 | 0.100 |

|               |                   |            |       |       |        |       |        |       |        |       |        |       |
|---------------|-------------------|------------|-------|-------|--------|-------|--------|-------|--------|-------|--------|-------|
| Breast cancer | ER- Breast cancer | ieu-a-1136 | 1.199 | 0.514 | 2.797  | 0.675 | 0.181  | 0.432 | 4.956  | 0.762 | -0.018 | 0.473 |
|               | ER- Breast cancer | ieu-a-1135 | 1.421 | 0.753 | 2.681  | 0.278 | 0.351  | 0.324 | 5.139  | 0.743 | -0.007 | 0.718 |
|               | ER- Breast cancer | ieu-a-1163 | 0.436 | 0.052 | 3.680  | 0.445 | -0.831 | 1.089 | 12.443 | 0.132 | 0.019  | 0.810 |
|               | ER+ Breast cancer | ieu-a-1127 | 0.859 | 0.630 | 1.172  | 0.339 | -0.151 | 0.158 | 6.155  | 0.630 | 0.005  | 0.575 |
|               | ER+ Breast cancer | ieu-a-1134 | 0.584 | 0.115 | 2.959  | 0.516 | -0.537 | 0.828 | 1.009  | 0.995 | -0.055 | 0.251 |
|               | ER+ Breast cancer | ieu-a-1167 | 1.122 | 0.738 | 1.706  | 0.590 | 0.115  | 0.214 | 4.244  | 0.936 | -0.013 | 0.380 |
|               | ER+ Breast cancer | ieu-a-1133 | 0.992 | 0.566 | 1.739  | 0.978 | -0.008 | 0.286 | 10.056 | 0.261 | 0.011  | 0.527 |
|               | ER+ Breast cancer | ieu-a-1132 | 0.808 | 0.541 | 1.205  | 0.295 | -0.214 | 0.204 | 5.952  | 0.653 | 0.006  | 0.584 |
|               | ER+ Breast cancer | ieu-a-1164 | 2.356 | 0.374 | 14.854 | 0.362 | 0.857  | 0.939 | 13.323 | 0.101 | -0.052 | 0.413 |

|                       |                                                                                |                                                |       |       |        |       |        |       |        |       |        |       |
|-----------------------|--------------------------------------------------------------------------------|------------------------------------------------|-------|-------|--------|-------|--------|-------|--------|-------|--------|-------|
| <b>Liver cancer</b>   | Malignant neoplasm of liver and intrahepatic bile ducts                        | finn-b-C3_LIVER_INTRAHEPATIC_BILE_DUCTS        | 2.041 | 0.175 | 23.830 | 0.569 | 0.713  | 1.254 | 5.739  | 0.837 | 0.049  | 0.515 |
|                       | Malignant neoplasm of liver and intrahepatic bile ducts (all cancers excluded) | finn-b-C3_LIVER_INTRAHEPATIC_BILE_DUCTS_EXALLC | 1.842 | 0.158 | 21.417 | 0.626 | 0.611  | 1.252 | 5.872  | 0.826 | 0.050  | 0.506 |
| <b>Ovarian cancer</b> | Serous ovarian cancer: low malignant potential                                 | ieu-a-1230                                     | 1.202 | 0.302 | 4.786  | 0.794 | 0.184  | 0.705 | 2.036  | 0.980 | -0.023 | 0.570 |
|                       | Serous ovarian cancer: low grade and low malignant potential                   | ieu-a-1229                                     | 0.475 | 0.148 | 1.528  | 0.212 | -0.743 | 0.595 | 2.579  | 0.958 | 0.008  | 0.822 |
|                       | Ovarian cancer                                                                 | ieu-a-1120                                     | 1.857 | 1.089 | 3.164  | 0.023 | 0.619  | 0.272 | 3.845  | 0.871 | 0.030  | 0.079 |
|                       | Mucinous ovarian cancer: invasive and low malignant potential                  | ieu-a-1231                                     | 1.538 | 0.452 | 5.236  | 0.491 | 0.430  | 0.625 | 1.634  | 0.990 | 0.061  | 0.109 |
|                       | Low malignant potential ovarian cancer                                         | ieu-a-1233                                     | 1.261 | 0.404 | 3.937  | 0.690 | 0.232  | 0.581 | 3.445  | 0.903 | 0.026  | 0.440 |
|                       | Low malignant potential mucinous ovarian cancer                                | ieu-a-1232                                     | 1.551 | 0.191 | 12.610 | 0.681 | 0.439  | 1.069 | 7.420  | 0.492 | 0.107  | 0.070 |
|                       | Low grade serous ovarian cancer                                                | ieu-a-1122                                     | 0.121 | 0.009 | 1.584  | 0.108 | -2.110 | 1.311 | 12.009 | 0.151 | 0.082  | 0.272 |

|                        |                                                                            |                                         |       |       |        |       |        |       |        |       |        |       |
|------------------------|----------------------------------------------------------------------------|-----------------------------------------|-------|-------|--------|-------|--------|-------|--------|-------|--------|-------|
| <b>Ovarian cancer</b>  | Invasive mucinous ovarian cancer                                           | ieu-a-1123                              | 1.707 | 0.345 | 8.448  | 0.512 | 0.535  | 0.816 | 4.728  | 0.786 | 0.020  | 0.660 |
|                        | Endometrioid ovarian cancer                                                | ieu-a-1125                              | 1.396 | 0.435 | 4.480  | 0.575 | 0.334  | 0.595 | 4.420  | 0.817 | 0.051  | 0.160 |
|                        | Clear cell ovarian cancer                                                  | ieu-a-1124                              | 1.746 | 0.239 | 12.784 | 0.583 | 0.558  | 1.016 | 12.565 | 0.128 | -0.054 | 0.367 |
| <b>Kidney cancer</b>   | "Malignant neoplasm of kidney, except renal pelvis" (all cancers excluded) | finn-b-C3_KIDNEY_NOTREN ALPELVIS_EXALLC | 0.178 | 0.044 | 0.722  | 0.016 | -1.727 | 0.715 | 4.916  | 0.897 | 0.054  | 0.223 |
|                        | Malignant neoplasm of kidney, except renal pelvis                          | finn-b-C3_KIDNEY_NOTREN ALPELVIS        | 0.186 | 0.046 | 0.749  | 0.018 | -1.681 | 0.710 | 5.395  | 0.863 | 0.057  | 0.195 |
|                        | Benign neoplasm: Kidney                                                    | finn-b-CD2_BENIGN_KIDNEY                | 0.604 | 0.063 | 5.744  | 0.660 | -0.505 | 1.150 | 11.373 | 0.329 | 0.027  | 0.710 |
|                        | Benign neoplasm: Kidney (all cancers excluded)                             | finn-b-CD2_BENIGN_KIDNEY_EXALLC         | 0.592 | 0.061 | 5.707  | 0.650 | -0.524 | 1.156 | 11.506 | 0.319 | 0.026  | 0.714 |
| <b>Prostate cancer</b> | Prostate cancer                                                            | ieu-b-4809                              | 1.005 | 0.980 | 1.030  | 0.724 | 0.004  | 0.013 | 7.403  | 0.494 | 0.001  | 0.560 |
|                        | Prostate cancer                                                            | ieu-b-85                                | 0.851 | 0.592 | 1.222  | 0.382 | -0.161 | 0.185 | 14.117 | 0.079 | -0.005 | 0.738 |

|                           |                                                     |                               |       |       |        |       |        |       |        |       |        |       |
|---------------------------|-----------------------------------------------------|-------------------------------|-------|-------|--------|-------|--------|-------|--------|-------|--------|-------|
| <b>Prostate cancer</b>    | Prostate cancer                                     | ukb-d-C3_PROSTATE             | 1.003 | 0.988 | 1.019  | 0.664 | 0.003  | 0.008 | 24.356 | 0.007 | 0.001  | 0.223 |
|                           | Prostate cancer                                     | finn-b-C3_PROSTATE_EXAL<br>LC | 0.871 | 0.461 | 1.647  | 0.671 | -0.138 | 0.325 | 8.071  | 0.622 | -0.012 | 0.530 |
| <b>Endometrial cancer</b> | Endometrial cancer                                  | ebi-a-GCST006464              | 1.278 | 0.742 | 2.204  | 0.377 | 0.246  | 0.278 | 6.637  | 0.576 | 0.005  | 0.791 |
|                           | Endometrial cancer<br>(endometrioid histology)      | ebi-a-GCST006465              | 1.436 | 0.750 | 2.748  | 0.275 | 0.362  | 0.331 | 4.586  | 0.801 | 0.031  | 0.180 |
|                           | Endometrial cancer (Non-<br>endometrioid histology) | ebi-a-GCST006466              | 1.307 | 0.154 | 11.102 | 0.806 | 0.268  | 1.092 | 8.787  | 0.186 | -0.086 | 0.261 |
