# Supplementary material for: Evolución de la renta agraria en España y en la UE-15, desde 1993 hasta 2011
Source: Royal Society of Chemistry journal article supplement (doi:10.1039/d3fo05756a), 2012-01-01
Supplement: d3fo05756a1.zip [file d3fo05756a1.zip]

**Supplemental Table 2. The phenotypes of each SNP searched in the PhenoScanner database.**

|        | SNP         | Effect Allele | Other Allele | Trait (phenotypes)                                                             | Ancestry | $\beta$    | SE        | <i>p</i> -value |
|--------|-------------|---------------|--------------|--------------------------------------------------------------------------------|----------|------------|-----------|-----------------|
| coffee | rs145990591 | A             | G            | Cause of death: malignant neoplasm of ureter                                   | European | 0.01372    | 0.003016  | 5.50E-06        |
|        | rs114565016 | A             | C            | Malignant neoplasm of pancreas                                                 | European | 0.001271   | 0.0002774 | 4.61E-06        |
|        | rs11936086  | C             | G            | Cause of death: cerebrum, except lobes and ventricles                          | European | 0.008574   | 0.001912  | 7.45E-06        |
|        | rs78115985  | G             | T            | Treatment with dorzolamide+timolol                                             | European | -0.0005417 | 0.0001129 | 1.62E-06        |
|        | rs141134342 | C             | T            | Treatment with protopic 0.03% ointment                                         | European | -0.0008201 | 0.0001704 | 1.48E-06        |
|        | rs72907976  | A             | G            | Cause of death: subarachnoid haemorrhage from intracranial artery, unspecified | European | 0.004737   | 0.0008162 | 6.73E-09        |
|        | rs138900734 | A             | C            | Treatment with flucloxacillin                                                  | European | 0.001309   | 0.0002904 | 6.60E-06        |
|        | rs140774793 | A             | G            | Cause of death: other specified place                                          | European | 0.01398    | 0.003004  | 3.31E-06        |
| cereal | rs145641302 | A             | G            | Treatment with gastrocote liquid                                               | European | 0.0007286  | 0.0001524 | 1.75E-06        |
|        | rs140773429 | C             | T            | Cause of death: home                                                           | European | 0.01305    | 0.002714  | 1.57E-06        |
|        | rs143055801 | C             | T            | Doctor diagnosed lung cancer                                                   | European | -0.002924  | 0.0005284 | 3.14E-08        |
|        | rs9807368   | C             | T            | Mean platelet volume                                                           | European | -0.04572   | 0.004098  | 6.62E-29        |
|        | rs9807368   | C             | T            | Platelet count                                                                 | European | 0.02171    | 0.004131  | 1.46E-07        |
|        | rs9807368   | C             | T            | Platelet distribution width                                                    | European | -0.04576   | 0.004072  | 2.67E-29        |
|        | rs9807368   | C             | T            | Platelet distribution width                                                    | European | 0.04576    | 0.004076  | 3.00E-29        |
|        | rs214818    | A             | G            | Other malignant neoplasms of skin                                              | European | -0.001808  | 0.0003599 | 5.08E-07        |
|        | rs214818    | A             | G            | Self-reported basal cell carcinoma                                             | European | -0.001294  | 0.0002918 | 9.24E-06        |
|        | rs75209402  | A             | G            | Cause of death: mesothelioma of pleura                                         | European | 0.01947    | 0.004224  | 4.10E-06        |
| tea    | rs186608696 | A             | G            | Treatment with migril tablet                                                   | European | 0.0007206  | 0.0001535 | 2.66E-06        |
|        | rs35172567  | A             | T            | Genetic generalized epilepsy                                                   | European | NA         | NA        | 3.22E-08        |
|        | rs35172567  | A             | T            | Forced vital capacity                                                          | European | -0.009178  | 0.002035  | 6.49E-06        |
|        | rs35172567  | A             | T            | Impedance of leg left                                                          | European | -0.01029   | 0.002285  | 6.71E-06        |
|        | rs35172567  | A             | T            | Impedance of leg right                                                         | European | -0.01109   | 0.002267  | 1.01E-06        |
|        | rs35172567  | A             | T            | Sleep duration                                                                 | European | -0.009859  | 0.001936  | 3.54E-07        |
|        | rs1335579   | A             | G            | Impedance of arm left                                                          | European | 0.01136    | 0.002436  | 3.09E-06        |
