# Supplementary material for: Evolución de la renta agraria en España y en la UE-15, desde 1993 hasta 2011
Source: Royal Society of Chemistry journal article supplement (doi:10.1039/d3fo05756a), 2012-01-01
Supplement: d3fo05756a1.zip [file d3fo05756a1.zip]

**Supplemental Table 3. Overview of selected SNPs that are strongly associated with exposure (AS consumption).**

|        | SNP         | Effect_Allele | Other_Allele | EAF      | $\beta$     | SE         | <i>p</i> -value | chr | Function    | Gene          | F value |
|--------|-------------|---------------|--------------|----------|-------------|------------|-----------------|-----|-------------|---------------|---------|
| cereal | rs72747173  | T             | C            | 0.266542 | -0.0110869  | 0.00224546 | 7.90E-07        | 1   | intergenic  | LHX9          | 24.38   |
|        | rs145641302 | A             | G            | 0.014446 | 0.0417765   | 0.00825296 | 4.10E-07        | 2   | intron      | INPP4A        | 25.62   |
|        | rs74820736  | C             | T            | 0.14228  | -0.0127849  | 0.0027467  | 3.20E-06        | 4   | intergenic  | RP11-500G9.1  | 21.67   |
|        | rs55980851  | A             | G            | 0.019671 | 0.0327601   | 0.00700917 | 3.00E-06        | 4   | 3_prime_UTR | TMEM154       | 21.85   |
|        | rs2288674   | A             | G            | 0.509315 | -0.00898835 | 0.00191713 | 2.80E-06        | 4   | intron      | 1-Mar         | 21.98   |
|        | rs188066979 | T             | C            | 0.020064 | 0.0324788   | 0.00710396 | 4.80E-06        | 5   | downstream  | CTD-2218K11.2 | 20.90   |
|        | rs117206618 | T             | C            | 0.017706 | 0.0342398   | 0.00725611 | 2.40E-06        | 6   | intergenic  | RNU6-248P     | 22.27   |
|        | rs140773429 | C             | T            | 0.01599  | 0.0369019   | 0.00800034 | 4.00E-06        | 6   | intron      | TARID         | 21.28   |
|        | rs116906430 | T             | C            | 0.011002 | 0.0467568   | 0.00948977 | 8.30E-07        | 7   | upstream    | AC073150.6    | 24.28   |
|        | rs7294858   | A             | G            | 0.249686 | -0.0115358  | 0.00222803 | 2.20E-07        | 12  | intron      | PRH1          | 26.81   |
|        | rs139091456 | A             | G            | 0.037547 | 0.0255681   | 0.00521606 | 9.50E-07        | 14  | intron      | CCDC175       | 24.03   |
|        | rs149157321 | T             | C            | 0.027196 | 0.031923    | 0.00643389 | 7.00E-07        | 15  | upstream    | RP11-20G13.1  | 24.62   |
|        | rs60728512  | C             | T            | 0.042979 | 0.0297958   | 0.00628371 | 2.10E-06        | 16  | intron      | RP11-410D17.2 | 22.48   |
|        | rs61275781  | C             | T            | 0.373344 | 0.00991525  | 0.00199391 | 6.60E-07        | 16  | intron      | RP11-420N3.2  | 24.73   |
|        | rs34075872  | A             | T            | 0.08285  | 0.0164808   | 0.00348254 | 2.20E-06        | 17  | intergenic  | RP11-618P13.1 | 22.40   |
|        | rs9807368   | C             | T            | 0.735974 | -0.0100077  | 0.00217573 | 4.20E-06        | 18  | upstream    | PPP4R1        | 21.16   |
|        | rs214818    | A             | G            | 0.79799  | -0.0120569  | 0.00239369 | 4.70E-07        | 20  | intron      | TGM3          | 25.37   |
|        | rs1153250   | C             | A            | 0.619474 | -0.00937584 | 0.00199564 | 2.60E-06        | 21  | intron      | AF131217.1    | 22.07   |
|        | rs115966947 | C             | A            | 0.008525 | 0.0540392   | 0.0107528  | 5.00E-07        | 22  | intron      | CTA-929C8.8   | 25.26   |
| coffee | rs11936086  | C             | G            | 0.013625 | 0.0686796   | 0.0146489  | 2.80E-06        | 4   | intron      | INTU          | 21.98   |
|        | rs78115985  | T             | G            | 0.023822 | 0.0515675   | 0.0111357  | 3.60E-06        | 5   | intergenic  | CTD-2232E5.2  | 21.44   |
|        | rs141134342 | T             | C            | 0.010666 | 0.0797698   | 0.0167203  | 1.80E-06        | 5   | intergenic  | LINC02142     | 22.76   |
|        | rs78234354  | T             | C            | 0.169085 | -0.0218794  | 0.00454019 | 1.40E-06        | 5   | intron      | MAPK9         | 23.22   |
|        | rs138306370 | C             | T            | 0.007002 | 0.107726    | 0.0215224  | 5.60E-07        | 8   | intron      | ST3GAL1       | 25.05   |

|        |             |   |   |          |            |            |            |    |            |               |       |
|--------|-------------|---|---|----------|------------|------------|------------|----|------------|---------------|-------|
| coffee | rs72907976  | A | G | 0.096938 | 0.0277523  | 0.00573663 | 1.30E-06   | 11 | intron     | CELF1         | 23.40 |
|        | rs12270786  | G | A | 0.39905  | 0.0166123  | 0.00360359 | 4.00E-06   | 11 | intergenic | RP11-326C3.15 | 21.25 |
|        | rs11068069  | T | C | 0.177108 | 0.0207445  | 0.00443796 | 2.90E-06   | 12 | upstream   | MAP1LC3B2     | 21.85 |
|        | rs61914781  | A | G | 0.253001 | -0.0338414 | 0.00390673 | 4.60E-18   | 12 | intron     | PRR4          | 75.04 |
|        | rs138900734 | A | C | 0.007499 | 0.10188    | 0.0215951  | 2.40E-06   | 14 | intron     | ESR2          | 22.26 |
|        | rs140774793 | A | G | 0.008949 | 0.0868514  | 0.0182361  | 1.90E-06   | 18 | intergenic | RP11-767C4.1  | 22.68 |
|        | rs238134    | C | G | 0.257109 | -0.0179481 | 0.00387652 | 3.70E-06   | 18 | intron     | TGIF1         | 21.44 |
| tea    | rs186608696 | A | G | 0.016206 | 0.0644177  | 0.0129094  | 0.0000006  | 1  | intergenic | RNA5SP73      | 24.90 |
|        | rs116388961 | T | C | 0.017444 | 0.0554218  | 0.012135   | 0.0000049  | 2  | upstream   | AC011286.1    | 20.86 |
|        | rs1403082   | C | A | 0.243978 | 0.0170521  | 0.0036935  | 0.0000039  | 3  | intron     | RP11-231I13.2 | 21.31 |
|        | rs79253620  | A | C | 0.109699 | 0.0252884  | 0.00511534 | 0.00000077 | 6  | intron     | B3GAT2        | 24.44 |
|        | rs139804693 | C | A | 0.022186 | 0.0537975  | 0.0117497  | 0.0000047  | 7  | intron     | DGKI          | 20.96 |
|        | rs77014507  | C | T | 0.203594 | 0.0193603  | 0.00403441 | 0.0000016  | 9  | intergenic | APTX          | 23.03 |
|        | rs117987395 | G | T | 0.017547 | 0.0662791  | 0.0133783  | 0.00000073 | 10 | intergenic | RP11-271F18.4 | 24.54 |
|        | rs72781148  | G | C | 0.009931 | 0.0734808  | 0.0160136  | 0.0000045  | 10 | intergenic | LINC00841     | 21.06 |
|        | rs61928618  | G | A | 0.254514 | -0.032642  | 0.003651   | 3.9E-19    | 12 | intron     | PRR4          | 79.93 |
|        | rs62045220  | T | C | 0.0594   | 0.0326678  | 0.00679435 | 0.0000015  | 15 | intron     | NEDD4         | 23.12 |
|        | rs79022294  | G | T | 0.015806 | 0.0611177  | 0.0131551  | 0.0000034  | 17 | intron     | FN3K          | 21.58 |
|        | rs11905412  | A | T | 0.096316 | -0.0250201 | 0.00538729 | 0.0000034  | 20 | intron     | PLCB1         | 21.57 |
|        | rs6091103   | G | A | 0.376353 | -0.0158338 | 0.00326666 | 0.0000013  | 20 | intron     | CTNNBL1       | 23.49 |
|        | rs1335579   | G | A | 0.852592 | -0.0212735 | 0.00447937 | 0.000002   | 20 | intron     | TCEA2         | 22.56 |
|        | rs191527510 | T | C | 0.010384 | 0.0773626  | 0.0161049  | 0.0000016  | 22 | intron     | NFAM1         | 23.08 |
