# Supplementary material for: Evolución de la renta agraria en España y en la UE-15, desde 1993 hasta 2011
Source: Royal Society of Chemistry journal article supplement (doi:10.1039/d3fo05756a), 2012-01-01
Supplement: d3fo05756a1.zip [file d3fo05756a1.zip]

**Supplemental Table 6. The negative results of MR study between intake of artificial sweetener added to tea and cancers.**

|             | Type of cancer               | GWAS ID                        | Inverse variance weighted |          |          |         |         |       | Heterogeneity |         | Pleio              |         |
|-------------|------------------------------|--------------------------------|---------------------------|----------|----------|---------|---------|-------|---------------|---------|--------------------|---------|
|             |                              |                                | Odds ratio                | CI lower | CI upper | p-value | $\beta$ | SE    | Q-value       | p-value | MR Egger-intercept | p-value |
| Lung cancer | Squamous cell lung cancer    | finn-b-C3_NSCLC_SQUAM_EXALLC   | 0.216                     | 0.021    | 2.224    | 0.198   | -1.534  | 1.190 | 14.409        | 0.346   | -0.062             | 0.436   |
|             | Squamous cell lung cancer    | finn-b-C3_NSCLC_SQUAM          | 0.229                     | 0.022    | 2.362    | 0.215   | -1.476  | 1.191 | 14.400        | 0.346   | -0.064             | 0.420   |
|             | Small cell lung cancer       | finn-b-C3_SCLC_EXALLC          | 0.974                     | 0.040    | 23.769   | 0.987   | -0.027  | 1.630 | 7.506         | 0.874   | 0.079              | 0.459   |
|             | Small cell lung cancer       | finn-b-C3_SCLC                 | 0.984                     | 0.040    | 23.962   | 0.992   | -0.016  | 1.629 | 7.267         | 0.888   | 0.078              | 0.463   |
|             | Non-small cell lung cancer   | finn-b-C3_LUNG_NONSMALL        | 0.529                     | 0.163    | 1.718    | 0.289   | -0.637  | 0.601 | 16.582        | 0.219   | -0.020             | 0.621   |
|             | Non-small cell lung cancer   | finn-b-C3_LUNG_NONSMALL_EXALLC | 0.532                     | 0.162    | 1.746    | 0.298   | -0.631  | 0.606 | 16.804        | 0.208   | -0.016             | 0.700   |
|             | Lung cancer and mesothelioma | ukb-d-LUNG_CANCER_MESOT        | 0.993                     | 0.988    | 0.999    | 0.032   | -0.007  | 0.003 | 16.819        | 0.208   | 0.000              | 0.666   |
|             | Lung cancer                  | ieu-b-4954                     | 0.993                     | 0.985    | 1.001    | 0.067   | -0.007  | 0.004 | 15.492        | 0.078   | 0.000              | 0.511   |

|                          |                             |                              |       |       |       |       |        |       |        |       |        |       |
|--------------------------|-----------------------------|------------------------------|-------|-------|-------|-------|--------|-------|--------|-------|--------|-------|
| <b>Lung cancer</b>       | lung adenocarcinoma         | finn-b-C3_NSCLC_ADENO_EXALLC | 0.647 | 0.107 | 3.926 | 0.636 | -0.435 | 0.920 | 10.423 | 0.659 | -0.002 | 0.974 |
|                          | lung adenocarcinoma         | finn-b-C3_NSCLC_ADENO        | 0.635 | 0.105 | 3.842 | 0.621 | -0.455 | 0.919 | 10.253 | 0.673 | -0.004 | 0.941 |
|                          | Lung cancer                 | ieu-a-987                    | 1.058 | 0.781 | 1.432 | 0.716 | 0.056  | 0.155 | 31.766 | 0.284 | 0.012  | 0.219 |
|                          | Lung adenocarcinoma         | ieu-a-984                    | 1.058 | 0.699 | 1.601 | 0.791 | 0.056  | 0.211 | 26.339 | 0.445 | 0.023  | 0.085 |
|                          | Squamous cell lung cancer   | ieu-a-989                    | 1.271 | 0.800 | 2.018 | 0.310 | 0.239  | 0.236 | 11.890 | 0.981 | 0.007  | 0.628 |
| <b>Colorectal cancer</b> | Colorectal cancer           | ieu-b-4965                   | 1.006 | 0.997 | 1.014 | 0.198 | 0.006  | 0.004 | 10.207 | 0.677 | 0.000  | 0.196 |
|                          | Colorectal cancer           | finn-b-C3_COLORECTAL_EXALLC  | 1.175 | 0.476 | 2.901 | 0.726 | 0.162  | 0.461 | 17.353 | 0.184 | -0.011 | 0.730 |
|                          | Colon adenocarcinoma        | finn-b-C3_COLON_ADENO_EXALLC | 1.281 | 0.401 | 4.091 | 0.676 | 0.247  | 0.593 | 12.613 | 0.478 | -0.003 | 0.939 |
|                          | Malignant neoplasm of colon | finn-b-C3_COLON_EXALLC       | 1.155 | 0.415 | 3.216 | 0.783 | 0.144  | 0.522 | 8.569  | 0.805 | -0.006 | 0.858 |

|                                                             |                                                      |                           |       |       |       |       |        |       |        |       |        |       |
|-------------------------------------------------------------|------------------------------------------------------|---------------------------|-------|-------|-------|-------|--------|-------|--------|-------|--------|-------|
| <b>Malignant neoplasm of stomach (all cancers excluded)</b> | Malignant neoplasm of stomach (all cancers excluded) | finn-b-C3_STOMACH_EXAL LC | 1.281 | 0.232 | 7.076 | 0.776 | 0.248  | 0.872 | 4.401  | 0.986 | 0.039  | 0.488 |
| <b>Breast cancer</b>                                        | Breast cancer                                        | ieu-b-4810                | 0.998 | 0.980 | 1.016 | 0.795 | -0.002 | 0.009 | 32.744 | 0.245 | -0.001 | 0.326 |
|                                                             | Breast cancer                                        | ebi-a-GCST004988          | 0.935 | 0.754 | 1.158 | 0.536 | -0.068 | 0.109 | 9.543  | 0.731 | 0.014  | 0.070 |
|                                                             | Breast cancer                                        | ebi-a-GCST007236          | 0.009 | 0.000 | 6157  | 0.494 | -4.679 | 6.839 | 12900  | 0.000 | -0.695 | 0.107 |
|                                                             | Breast cancer                                        | ieu-a-1126                | 0.911 | 0.710 | 1.170 | 0.466 | -0.093 | 0.127 | 9.198  | 0.686 | 0.014  | 0.067 |
|                                                             | Breast cancer                                        | ieu-a-1131                | 0.559 | 0.241 | 1.295 | 0.175 | -0.582 | 0.429 | 16.405 | 0.173 | 0.018  | 0.510 |
|                                                             | Breast cancer                                        | ieu-a-1168                | 1.054 | 0.708 | 1.570 | 0.795 | 0.053  | 0.203 | 2.958  | 0.998 | 0.013  | 0.342 |
|                                                             | Breast cancer                                        | ieu-a-1130                | 1.076 | 0.701 | 1.652 | 0.737 | 0.073  | 0.219 | 5.022  | 0.957 | 0.019  | 0.157 |
|                                                             | Breast cancer                                        | ieu-a-1129                | 0.909 | 0.653 | 1.267 | 0.574 | -0.095 | 0.169 | 9.427  | 0.666 | 0.013  | 0.213 |

|                      |                   |            |       |       |        |       |        |       |        |       |        |       |
|----------------------|-------------------|------------|-------|-------|--------|-------|--------|-------|--------|-------|--------|-------|
| <b>Breast cancer</b> | Breast cancer     | ieu-a-1165 | 2.145 | 0.725 | 6.351  | 0.168 | 0.763  | 0.554 | 11.900 | 0.371 | -0.028 | 0.459 |
|                      | Breast cancer     | ukb-a-55   | 0.993 | 0.981 | 1.004  | 0.213 | -0.007 | 0.006 | 9.509  | 0.734 | -0.001 | 0.025 |
|                      | ER- Breast cancer | ieu-a-1128 | 0.716 | 0.364 | 1.408  | 0.333 | -0.335 | 0.345 | 28.195 | 0.005 | 0.013  | 0.541 |
|                      | ER- Breast cancer | ieu-a-1137 | 0.363 | 0.083 | 1.595  | 0.180 | -1.013 | 0.755 | 20.099 | 0.065 | 0.019  | 0.693 |
|                      | ER- Breast cancer | ieu-a-1166 | 0.465 | 0.211 | 1.022  | 0.057 | -0.766 | 0.402 | 8.501  | 0.810 | -0.001 | 0.969 |
|                      | ER- Breast cancer | ieu-a-1136 | 0.750 | 0.296 | 1.903  | 0.545 | -0.287 | 0.475 | 15.450 | 0.218 | 0.013  | 0.652 |
|                      | ER- Breast cancer | ieu-a-1135 | 0.833 | 0.385 | 1.799  | 0.641 | -0.183 | 0.393 | 20.678 | 0.055 | 0.014  | 0.536 |
|                      | ER- Breast cancer | ieu-a-1163 | 1.403 | 0.164 | 12.026 | 0.757 | 0.339  | 1.096 | 14.463 | 0.208 | 0.049  | 0.521 |
|                      | ER+ Breast cancer | ieu-a-1127 | 1.152 | 0.826 | 1.607  | 0.405 | 0.141  | 0.170 | 14.475 | 0.271 | 0.013  | 0.191 |

|                       |                                                                                |                                                |       |       |        |       |        |       |        |       |        |       |
|-----------------------|--------------------------------------------------------------------------------|------------------------------------------------|-------|-------|--------|-------|--------|-------|--------|-------|--------|-------|
| <b>Breast cancer</b>  | ER+ Breast cancer                                                              | ieu-a-1134                                     | 0.862 | 0.219 | 3.386  | 0.831 | -0.149 | 0.698 | 10.428 | 0.492 | -0.026 | 0.551 |
|                       | ER+ Breast cancer                                                              | ieu-a-1167                                     | 1.407 | 0.876 | 2.261  | 0.158 | 0.342  | 0.242 | 8.218  | 0.829 | 0.020  | 0.207 |
|                       | ER+ Breast cancer                                                              | ieu-a-1133                                     | 1.414 | 0.852 | 2.347  | 0.181 | 0.346  | 0.259 | 12.356 | 0.417 | 0.012  | 0.416 |
|                       | ER+ Breast cancer                                                              | ieu-a-1132                                     | 1.054 | 0.726 | 1.531  | 0.781 | 0.053  | 0.190 | 8.660  | 0.732 | 0.016  | 0.166 |
|                       | ER+ Breast cancer                                                              | ieu-a-1164                                     | 2.582 | 0.317 | 21.040 | 0.375 | 0.949  | 1.070 | 18.236 | 0.076 | -0.086 | 0.223 |
| <b>Liver cancer</b>   | Malignant neoplasm of liver and intrahepatic bile ducts                        | finn-b-C3_LIVER_INTRAHEPATIC_BILE_DUCTS        | 7.121 | 0.515 | 98.539 | 0.143 | 1.963  | 1.341 | 15.828 | 0.259 | -0.032 | 0.722 |
|                       | Malignant neoplasm of liver and intrahepatic bile ducts (all cancers excluded) | finn-b-C3_LIVER_INTRAHEPATIC_BILE_DUCTS_EXALLC | 6.983 | 0.507 | 96.203 | 0.146 | 1.943  | 1.338 | 15.809 | 0.260 | -0.029 | 0.744 |
| <b>Ovarian cancer</b> | Serous ovarian cancer: low malignant potential                                 | ieu-a-1230                                     | 0.492 | 0.121 | 2.000  | 0.322 | -0.708 | 0.715 | 14.709 | 0.258 | -0.022 | 0.606 |

|                       |                                                               |            |       |       |       |       |        |       |        |       |        |       |
|-----------------------|---------------------------------------------------------------|------------|-------|-------|-------|-------|--------|-------|--------|-------|--------|-------|
| <b>Ovarian cancer</b> | Serous ovarian cancer: low grade and low malignant potential  | ieu-a-1229 | 0.455 | 0.154 | 1.344 | 0.154 | -0.789 | 0.553 | 10.428 | 0.578 | 0.012  | 0.698 |
|                       | Ovarian cancer                                                | ieu-b-4963 | 1.005 | 0.997 | 1.012 | 0.255 | 0.005  | 0.004 | 12.491 | 0.407 | 0.000  | 0.529 |
|                       | Mucinous ovarian cancer: invasive and low malignant potential | ieu-a-1231 | 1.063 | 0.344 | 3.282 | 0.915 | 0.061  | 0.575 | 11.680 | 0.472 | 0.020  | 0.552 |
|                       | Low malignant potential ovarian cancer                        | ieu-a-1233 | 0.609 | 0.211 | 1.755 | 0.358 | -0.496 | 0.540 | 11.099 | 0.520 | -0.013 | 0.671 |
|                       | Low malignant potential mucinous ovarian cancer               | ieu-a-1232 | 0.916 | 0.174 | 4.820 | 0.918 | -0.087 | 0.847 | 8.254  | 0.765 | -0.005 | 0.916 |
|                       | Low grade serous ovarian cancer                               | ieu-a-1122 | 0.434 | 0.053 | 3.548 | 0.436 | -0.836 | 1.073 | 14.575 | 0.266 | 0.082  | 0.191 |
|                       | Invasive mucinous ovarian cancer                              | ieu-a-1123 | 1.373 | 0.310 | 6.069 | 0.676 | 0.317  | 0.758 | 11.491 | 0.487 | 0.039  | 0.378 |
|                       | Endometrioid ovarian cancer                                   | ieu-a-1125 | 0.599 | 0.166 | 2.158 | 0.433 | -0.512 | 0.654 | 18.466 | 0.102 | -0.001 | 0.975 |
|                       | Clear cell ovarian cancer                                     | ieu-a-1124 | 1.546 | 0.272 | 8.776 | 0.623 | 0.436  | 0.886 | 17.491 | 0.132 | 0.000  | 0.995 |

|                                      |                                                                            |                                            |       |       |        |       |        |       |        |       |        |       |
|--------------------------------------|----------------------------------------------------------------------------|--------------------------------------------|-------|-------|--------|-------|--------|-------|--------|-------|--------|-------|
| <b>Kidney cancer</b>                 | "Malignant neoplasm of kidney, except renal pelvis" (all cancers excluded) | finn-b-C3_KIDNEY_NOTRE<br>NALPELVIS_EXALLC | 0.676 | 0.152 | 3.002  | 0.607 | -0.392 | 0.761 | 16.059 | 0.246 | 0.000  | 0.997 |
|                                      | Malignant neoplasm of kidney, except renal pelvis                          | finn-b-C3_KIDNEY_NOTRE<br>NALPELVIS        | 0.695 | 0.156 | 3.093  | 0.633 | -0.364 | 0.762 | 16.234 | 0.237 | -0.003 | 0.961 |
|                                      | Benign neoplasm: Kidney                                                    | finn-b-CD2_BENIGN_KIDNEY                   | 0.612 | 0.069 | 5.455  | 0.660 | -0.491 | 1.116 | 8.216  | 0.829 | -0.071 | 0.337 |
|                                      | Benign neoplasm: Kidney (all cancers excluded)                             | finn-b-CD2_BENIGN_KIDNEY_EXALLC            | 0.613 | 0.069 | 5.464  | 0.661 | -0.489 | 1.116 | 7.823  | 0.855 | -0.067 | 0.361 |
| <b>Head and neck cancer</b>          | Head and neck cancer                                                       | ieu-b-4912                                 | 1.003 | 0.997 | 1.008  | 0.329 | 0.003  | 0.003 | 17.260 | 0.100 | 0.000  | 0.314 |
| <b>Oral and oropharyngeal cancer</b> | Oral and oropharyngeal cancer                                              | ieu-b-4962                                 | 1.001 | 0.997 | 1.005  | 0.704 | 0.001  | 0.002 | 12.997 | 0.294 | 0.000  | 0.124 |
|                                      | Oral cavity and pharyngeal cancer                                          | ieu-b-89                                   | 2.200 | 0.356 | 13.598 | 0.396 | 0.789  | 0.929 | 13.629 | 0.136 | 0.025  | 0.725 |
|                                      | Oral cavity and pharyngeal cancer                                          | ieu-b-90                                   | 6.619 | 1.332 | 32.885 | 0.021 | 1.890  | 0.818 | 7.714  | 0.563 | 0.014  | 0.811 |
|                                      | Oral cavity cancer                                                         | ieu-b-94                                   | 1.817 | 0.271 | 12.179 | 0.538 | 0.597  | 0.971 | 8.377  | 0.497 | 0.025  | 0.721 |

|                                      |                                                |                               |       |       |        |       |        |       |        |       |        |       |
|--------------------------------------|------------------------------------------------|-------------------------------|-------|-------|--------|-------|--------|-------|--------|-------|--------|-------|
| <b>Oral and oropharyngeal cancer</b> | Oropharyngeal cancer                           | ieu-b-96                      | 5.373 | 0.691 | 41.753 | 0.108 | 1.681  | 1.046 | 9.185  | 0.420 | 0.022  | 0.770 |
|                                      | Oropharyngeal cancer                           | ieu-b-97                      | 2.913 | 0.380 | 22.322 | 0.303 | 1.069  | 1.039 | 5.375  | 0.800 | 0.059  | 0.441 |
| <b>Prostate cancer</b>               | Prostate cancer                                | ieu-b-4809                    | 1.004 | 0.982 | 1.027  | 0.707 | 0.004  | 0.011 | 12.154 | 0.515 | 0.000  | 0.828 |
|                                      | Prostate cancer                                | ieu-b-85                      | 0.957 | 0.731 | 1.253  | 0.751 | -0.044 | 0.138 | 8.271  | 0.825 | -0.019 | 0.057 |
|                                      | Prostate cancer                                | ukb-d-C3_PROSTATE             | 1.004 | 0.994 | 1.013  | 0.442 | 0.004  | 0.005 | 9.332  | 0.747 | 0.000  | 0.194 |
|                                      | Prostate cancer                                | finn-b-C3_PROSTATE_EXA<br>LLC | 1.399 | 0.610 | 3.210  | 0.428 | 0.336  | 0.424 | 22.513 | 0.048 | 0.023  | 0.414 |
| <b>Oesophageal cancer</b>            | Oesophageal cancer                             | ieu-b-4960                    | 0.998 | 0.995 | 1.002  | 0.342 | -0.002 | 0.002 | 4.665  | 0.862 | 0.000  | 0.876 |
| <b>Endometrial cancer</b>            | Endometrial cancer                             | ebi-a-GCST006464              | 0.709 | 0.419 | 1.197  | 0.198 | -0.344 | 0.268 | 7.916  | 0.792 | 0.013  | 0.457 |
|                                      | Endometrial cancer<br>(endometrioid histology) | ebi-a-GCST006465              | 0.828 | 0.445 | 1.541  | 0.552 | -0.188 | 0.317 | 7.606  | 0.815 | -0.008 | 0.698 |



|                           |                                                 |                  |       |       |       |       |       |       |        |       |        |       |
|---------------------------|-------------------------------------------------|------------------|-------|-------|-------|-------|-------|-------|--------|-------|--------|-------|
| <b>Endometrial cancer</b> | Endometrial cancer (Non-endometrioid histology) | ebi-a-GCST006466 | 1.357 | 0.256 | 7.186 | 0.720 | 0.305 | 0.850 | 13.244 | 0.278 | -0.047 | 0.422 |
|---------------------------|-------------------------------------------------|------------------|-------|-------|-------|-------|-------|-------|--------|-------|--------|-------|
