# Supplementary material for: Evolución de la renta agraria en España y en la UE-15, desde 1993 hasta 2011
Source: Royal Society of Chemistry journal article supplement (doi:10.1039/d3fo05756a), 2012-01-01
Supplement: d3fo05756a1.zip [file d3fo05756a1.zip]

**Supplemental Table 1. Overview of the source of cancer data.**

|                    | <b>GWAS ID</b>                 | <b>Year</b> | <b>Trait</b>                 | <b>Consortium</b> | <b>Sample size</b> | <b>Case</b> | <b>Control</b> | <b>Number of SNPs</b> | <b>Population</b> |
|--------------------|--------------------------------|-------------|------------------------------|-------------------|--------------------|-------------|----------------|-----------------------|-------------------|
| <b>Lung cancer</b> | finn-b-C3_NSCLC_SQUAM_EXALLC   | 2021        | Squamous cell lung cancer    | NA                | 174,369            | 365         | 174,004        | 16380303              | European          |
|                    | finn-b-C3_NSCLC_SQUAM          | 2021        | Squamous cell lung cancer    | NA                | 218,792            | 365         | 218,427        | 16380466              | European          |
|                    | ieu-a-967                      | 2014        | Squamous cell lung cancer    | ILCCO             | 18313              | 3275        | 15,038         | 8893750               | European          |
|                    | finn-b-C3_SCLC_EXALLC          | 2021        | Small cell lung cancer       | FINNGEN           | 174,185            | 179         | 174,006        | 16380303              | European          |
|                    | finn-b-C3_SCLC                 | 2021        | Small cell lung cancer       | FINNGEN           | 218,792            | 179         | 218,613        | 16380466              | European          |
|                    | finn-b-C3_LUNG_NONSMALL        | 2021        | Non-small cell lung cancer   | FINNGEN           | 218,792            | 1627        | 217,165        | 16380466              | European          |
|                    | finn-b-C3_LUNG_NONSMALL_EXALLC | 2021        | Non-small cell lung cancer   | FINNGEN           | 175,633            | 1627        | 174,006        | 16380305              | European          |
|                    | ukb-d-LUNG_CANCER_MESOT        | 2018        | Lung cancer and mesothelioma | NA                | 361194             | 2007        | 359,187        | 10455414              | European          |
|                    | ieu-b-4954                     | 2021        | Lung cancer                  | UK Biobank        | 374687             | 2671        | 372,016        | 11078115              | European          |

|                          |                              |      |                                         |            |         |        |         |            |          |
|--------------------------|------------------------------|------|-----------------------------------------|------------|---------|--------|---------|------------|----------|
| <b>Lung cancer</b>       | ieu-a-966                    | 2014 | Lung cancer                             | ILCCO      | 27209   | 11,348 | 15,861  | 8945893    | European |
|                          | ieu-b-4955                   | 2021 | Lung cancer                             | UK Biobank | 374687  | 2671   | 372,016 | 11078115   | European |
|                          | finn-b-C3_NSCLC_ADENO_EXALLC | 2021 | lung adenocarcinoma                     | FINNGEN    | 174,576 | 571    | 174,005 | 16380303   | European |
|                          | ieu-a-965                    | 2014 | Lung adenocarcinoma                     | ILCCO      | 18336   | 3442   | 14,894  | 8881354    | European |
|                          | finn-b-C3_NSCLC_ADENO        | 2021 | lung adenocarcinoma                     | FINNGEN    | 218,792 | 571    | 218,221 | 16380466   | European |
|                          | ukb-d-C3_BRONCHUS_LUNG       | 2018 | Malignant neoplasm of bronchus and lung | NA         | 361,194 | 1,681  | 359,513 | 10,156,362 | European |
|                          | ieu-a-987                    |      | Lung cancer                             | TRICL      | 85,449  | 29,863 | 55,586  | 10,439,018 | European |
|                          | ieu-a-984                    |      | Lung adenocarcinoma                     | TRICL      | 65,864  | 11,245 | 54,619  | 10,345,176 | European |
|                          | ieu-a-989                    |      | Squamous cell lung cancer               | TRICL      | 62,467  | 7,704  | 62,467  | 10,341,529 | European |
| <b>Colorectal cancer</b> | ieu-b-4965                   | 2021 | Colorectal cancer                       | UK Biobank | 377673  | 5657   | 372,016 | 11738639   | European |
|                          | finn-b-C3_COLORECTAL_EXALLC  | 2021 | Colorectal cancer                       | FINNGEN    | 177028  | 3,022  | 174,006 | 16380321   | European |

|                                                             |                              |      |                                                      |            |        |         |         |          |          |
|-------------------------------------------------------------|------------------------------|------|------------------------------------------------------|------------|--------|---------|---------|----------|----------|
| <b>Colorectal cancer</b>                                    | finn-b-C3_COLON_ADENO_EXALLC | 2021 | Colon adenocarcinoma                                 | FINNGEN    | 175402 | 1396    | 174,006 | 16380311 | European |
|                                                             | finn-b-C3_COLON_EXALLC       | 2021 | Malignant neoplasm of colon                          | FINNGEN    | 175809 | 1,803   | 174,006 | 16380317 | European |
| <b>Malignant neoplasm of stomach (all cancers excluded)</b> | finn-b-C3_STOMACH_EXALLC     | 2021 | Malignant neoplasm of stomach (all cancers excluded) | FINNGEN    | 174639 | 633     | 174,006 | 16380305 | European |
| <b>Breast cancer</b>                                        | ieu-b-4810                   | 2021 | Breast cancer                                        | UK Biobank | 212402 | 13,879  | 198,523 | NA       | European |
|                                                             | ebi-a-GCST004988             | 2017 | Breast cancer                                        | NA         | 139274 | 76,192  | 63,082  | 11069665 | European |
|                                                             | ebi-a-GCST007236             | 2015 | Breast cancer                                        | NA         | 89677  | 46,785  | 42,892  | 13742658 | European |
|                                                             | ieu-a-1126                   | 2017 | Breast cancer                                        | BCAC       | 228951 | 122,977 | 105,974 | 10680257 | European |
|                                                             | ieu-a-1131                   | 2017 | Breast cancer                                        | BCAC       | 32498  | 14,910  | 17,588  | 10680257 | European |
|                                                             | ieu-a-1168                   | 2015 | Breast cancer                                        | BCAC       | 33832  | 15,748  | 18,084  | 13011123 | European |
|                                                             | ieu-a-1130                   | 2017 | Breast cancer                                        | BCAC       | 89677  | 46,785  | 42,892  | 10680257 | European |

|                      |             |      |                   |           |        |        |         |          |          |
|----------------------|-------------|------|-------------------|-----------|--------|--------|---------|----------|----------|
| <b>Breast cancer</b> | ieu-a-1162  | 2015 | Breast cancer     | BCAC      | 89677  | 46,785 | 42,892  | 195514   | European |
|                      | ieu-a-1129  | 2017 | Breast cancer     | BCAC      | 106776 | 61,282 | 45,494  | 10680257 | European |
|                      | ieu-a-1165  | 2015 | Breast cancer     | BCAC      | 37954  | 2900   | 35,054  | 12940150 | European |
|                      | ukb-a-55    | 2017 | Breast cancer     | Neale Lab | 337159 | 7,480  | 329,679 | 10894596 | European |
|                      | ukb-b-16890 | 2018 | Breast cancer     | MRC-IEU   | 462933 | 10,303 | 452,630 | 9851867  | European |
|                      | ieu-a-1128  | 2017 | ER- Breast cancer | BCAC      | 127442 | 21,468 | 105,974 | 10680257 | European |
|                      | ieu-a-1137  | 2017 | ER- Breast cancer | BCAC      | 22068  | 4,480  | 17,588  | 10680257 | European |
|                      | ieu-a-1166  | 2015 | ER- Breast cancer | BCAC      | 21695  | 3,611  | 18,084  | 13011123 | European |
|                      | ieu-a-1136  | 2017 | ER- Breast cancer | BCAC      | 50225  | 7,333  | 42,892  | 10680257 | European |
|                      | ieu-a-1160  | 2015 | ER- Breast cancer | BCAC      | 50225  | 7,333  | 42,892  | 195514   | European |
|                      | ieu-a-1135  | 2017 | ER- Breast cancer | BCAC      | 55149  | 9,655  | 45,494  | 10680257 | European |

|                      |             |      |                                                                          |            |         |        |         |           |          |
|----------------------|-------------|------|--------------------------------------------------------------------------|------------|---------|--------|---------|-----------|----------|
| <b>Breast cancer</b> | ieu-a-1163  | 2015 | ER- Breast cancer                                                        | BCAC       | 6881    | 920    | 5,961   | 8828662   | European |
|                      | ieu-a-1127  | 2017 | ER+ Breast cancer                                                        | BCAC       | 175475  | 69,501 | 105,974 | 10680257  | European |
|                      | ieu-a-1134  | 2017 | ER+ Breast cancer                                                        | BCAC       | 21814   | 4,226  | 17,588  | 10680257  | European |
|                      | ieu-a-1167  | 2015 | ER+ Breast cancer                                                        | BCAC       | 22286   | 4,202  | 18,084  | 13011123  | European |
|                      | ieu-a-1133  | 2017 | ER+ Breast cancer                                                        | BCAC       | 69970   | 27,078 | 42,892  | 10680257  | European |
|                      | ieu-a-1161  | 2015 | ER+ Breast cancer                                                        | BCAC       | 69970   | 27,078 | 42,892  | 195514    | European |
|                      | ieu-a-1132  | 2017 | ER+ Breast cancer                                                        | BCAC       | 83691   | 38,197 | 45,494  | 10680257  | European |
|                      | ieu-a-1164  | 2015 | ER+ Breast cancer                                                        | BCAC       | 23059   | 1,333  | 21,726  | 8714606   | European |
| <b>Liver cancer</b>  | ukb-b-16713 | 2018 | Diagnoses - secondary ICD10: C78.7 Secondary malignant neoplasm of liver | MRC-IEU    | 463,010 | 1,139  | 461,871 | 9,851,867 | European |
|                      | ieu-b-4915  | 2021 | Liver & bile duct cancer                                                 | UK Biobank | 372,366 | 350    | 372,016 | 7,687,713 | European |
|                      | ieu-b-4953  | 2021 | Liver cell carcinoma                                                     | UK Biobank | 372,184 | 168    | 372,016 | 6,304,034 | European |

|                       |                                                |      |                                                                                |            |        |        |         |            |          |
|-----------------------|------------------------------------------------|------|--------------------------------------------------------------------------------|------------|--------|--------|---------|------------|----------|
| <b>Liver cancer</b>   | finn-b-C3_LIVER_INTRAHEPATIC_BILE_DUCTS        | 2021 | Malignant neoplasm of liver and intrahepatic bile ducts                        | NA         | 218792 | 304    | 218,488 | 16,380,466 | European |
|                       | finn-b-C3_LIVER_INTRAHEPATIC_BILE_DUCTS_EXALLC | 2021 | Malignant neoplasm of liver and intrahepatic bile ducts (all cancers excluded) | NA         | 174310 | 304    | 174,006 | 16,380,303 | European |
| <b>Ovarian cancer</b> | ieu-a-1230                                     | 2017 | Serous ovarian cancer: low malignant potential                                 | OCAC       | 42895  | 1,954  | 40,941  | NA         | European |
|                       | ieu-a-1229                                     | 2017 | Serous ovarian cancer: low grade and low malignant potential                   | OCAC       | 43907  | 2,966  | 40,941  | NA         | European |
|                       | ieu-b-4963                                     | 2021 | Ovarian cancer                                                                 | UK Biobank | 199741 | 1218   | 198,523 | 9822229    | European |
|                       | ieu-a-1120                                     | 2017 | Ovarian cancer                                                                 | OCAC       | 66450  | 25,509 | 40,941  | NA         | European |
|                       | ieu-a-1231                                     | 2017 | Mucinous ovarian cancer: invasive and low malignant potential                  | OCAC       | 43507  | 2,566  | 40,941  | NA         | European |
|                       | ieu-a-1233                                     | 2017 | Low malignant potential ovarian cancer                                         | OCAC       | 47147  | 3,103  | 40,941  | NA         | European |
|                       | ieu-a-1232                                     | 2017 | Low malignant potential mucinous ovarian cancer                                | OCAC       | 42090  | 1149   | 40,941  | NA         | European |
|                       | ieu-a-1122                                     | 2017 | Low grade serous ovarian cancer                                                | OCAC       | 41953  | 1012   | 40,941  | NA         | European |
|                       | ieu-a-1123                                     | 2017 | Invasive mucinous ovarian cancer                                               | OCAC       | 42358  | 1,417  | 40,941  | NA         | European |

|                             |                                        |      |                                                                              |            |        |        |         |            |          |
|-----------------------------|----------------------------------------|------|------------------------------------------------------------------------------|------------|--------|--------|---------|------------|----------|
| <b>Ovarian cancer</b>       | ieu-a-1121                             | 2017 | High grade serous ovarian cancer                                             | OCAC       | 53978  | 13,037 | 40,941  | NA         | European |
|                             | ieu-a-1228                             | 2017 | High grade and low grade serous ovarian cancer                               | OCAC       | 54990  | 14,049 | 40,941  | NA         | European |
|                             | ieu-a-1125                             | 2017 | Endometrioid ovarian cancer                                                  | OCAC       | 43751  | 2,810  | 40,941  | NA         | European |
|                             | ieu-a-1124                             | 2017 | Clear cell ovarian cancer                                                    | OCAC       | 42307  | 1366   | 40,941  | NA         | European |
| <b>Kidney cancer</b>        | ukb-b-1316                             | 2018 | Type of cancer: ICD10: C64 Malignant neoplasm of kidney, except renal pelvis | Binary     | 463010 | 1,114  | 461,896 | 461,896    | European |
|                             | finn-b-C3_KIDNEY_NOTRENALPELVIS_EXALLC | 2021 | "Malignant neoplasm of kidney, except renal pelvis" (all cancers excluded)   | Binary     | 174977 | 971    | 174,006 | 16,380,308 | European |
|                             | finn-b-C3_KIDNEY_NOTRENALPELVIS        | 2021 | Malignant neoplasm of kidney, except renal pelvis                            | Binary     | 218792 | 971    | 217,821 | 16,380,466 | European |
|                             | finn-b-CD2_BENIGN_KIDNEY               | 2021 | Benign neoplasm: Kidney                                                      | Binary     | 218792 | 381    | 218,411 | 16,380,466 | European |
|                             | finn-b-CD2_BENIGN_KIDNEY_EXALLC        | 2021 | Benign neoplasm: Kidney (all cancers excluded)                               | Binary     | 180887 | 381    | 180,506 | 16,380,337 | European |
| <b>Head and neck cancer</b> | ieu-b-4912                             | 2021 | Head and neck cancer                                                         | UK Biobank | 373122 | 1,106  | 372,016 | 9655080    | European |
| <b>Laryngeal cancer</b>     | ieu-b-4913                             | 2021 | Laryngeal cancer                                                             | UK Biobank | 372289 | 273    | 372,016 | 7239512    | European |

|                    |            |      |                                   |                                                |        |       |         |         |          |
|--------------------|------------|------|-----------------------------------|------------------------------------------------|--------|-------|---------|---------|----------|
| Oral cavity cancer | ieu-b-4961 | 2021 | Oral cavity cancer                | UK Biobank                                     | 372373 | 357   | 372,016 | 7723107 | European |
|                    | ieu-b-4962 | 2021 | Oral and oropharyngeal cancer     | UK Biobank                                     | 372855 | 839   | 372,016 | 9185233 | European |
|                    | ieu-b-4968 | 2021 | Oropharyngeal cancer              | UK Biobank                                     | 372510 | 494   | 372,016 | 8283869 | European |
|                    | ieu-b-86   | 2016 | Oral cavity and pharyngeal cancer | Oncoarray oral cavity and oropharyngeal cancer | 5425   | 2497  | 2,928   | 7514278 | European |
|                    | ieu-b-87   | 2016 | Oral cavity and pharyngeal cancer | Oncoarray oral cavity and oropharyngeal cancer | 4671   | 2,342 | 2329    | 7510261 | European |
|                    | ieu-b-88   | 2016 | Oral cavity and pharyngeal cancer | Oncoarray oral cavity and oropharyngeal cancer | 1340   | 613   | 727     | 7514889 | European |
|                    | ieu-b-89   | 2016 | Oral cavity and pharyngeal cancer | Oncoarray oral cavity and oropharyngeal cancer | 5425   | 2497  | 2,928   | 7514278 | European |
|                    | ieu-b-90   | 2016 | Oral cavity and pharyngeal cancer | Oncoarray oral cavity and oropharyngeal cancer | 4671   | 2,342 | 2329    | 7510261 | European |
|                    | ieu-b-91   | 2016 | Oral cavity and pharyngeal cancer | Oncoarray oral cavity and oropharyngeal cancer | 1340   | 613   | 727     | 7514889 | European |



|                           |                   |      |                      |                                                |        |        |         |          |          |
|---------------------------|-------------------|------|----------------------|------------------------------------------------|--------|--------|---------|----------|----------|
| <b>Oral cavity cancer</b> | ieu-b-93          | 2016 | Oral cavity cancer   | Oncoarray oral cavity and oropharyngeal cancer | 3464   | 1135   | 2,329   | 7506142  | European |
|                           | ieu-b-94          | 2016 | Oral cavity cancer   | Oncoarray oral cavity and oropharyngeal cancer | 4151   | 1223   | 2,928   | 7510833  | European |
|                           | ieu-b-95          | 2016 | Oral cavity cancer   | Oncoarray oral cavity and oropharyngeal cancer | 1067   | 340    | 727     | 7511499  | European |
|                           | ieu-b-96          | 2016 | Oropharyngeal cancer | Oncoarray oral cavity and oropharyngeal cancer | 4018   | 1090   | 2,928   | 7508444  | European |
|                           | ieu-b-97          | 2016 | Oropharyngeal cancer | Oncoarray oral cavity and oropharyngeal cancer | 3448   | 1,119  | 2329    | 7506485  | European |
|                           | ieu-b-98          | 2016 | Oropharyngeal cancer | Oncoarray oral cavity and oropharyngeal cancer | 932    | 205    | 727     | 7506712  | European |
| <b>Prostate cancer</b>    | ieu-b-4809        | 2021 | Prostate cancer      | UK Biobank                                     | 182625 | 9132   | 173,493 | NA       | European |
|                           | ieu-b-85          | 2018 | Prostate cancer      | PRACTICAL                                      | 140254 | 79,148 | 61,106  | 20346368 | European |
|                           | ukb-d-C3_PROSTATE | 2018 | Prostate cancer      | Neale lab                                      | 361194 | 6321   | 354,873 | 12453833 | European |

|                           |                           |      |                                                 |            |         |        |         |           |          |
|---------------------------|---------------------------|------|-------------------------------------------------|------------|---------|--------|---------|-----------|----------|
| <b>Prostate cancer</b>    | finn-b-C3_PROSTATE_EXALLC | 2021 | Prostate cancer                                 | FINNGEN    | 80,996  | 6311   | 74,685  | 16377987  | European |
| <b>Oesophageal cancer</b> | ieu-b-4960                | 2021 | Oesophageal cancer                              | UK Biobank | 372,756 | 740    | 372,016 | 8,970,465 | European |
| <b>Endometrial cancer</b> | ukb-b-13545               | 2018 | endometrial cancer                              | MRC-IEU    | 462933  | 1151   | 461,782 | 9851867   | European |
|                           | ebi-a-GCST006464          | 2018 | Endometrial cancer                              | NA         | 121885  | 12,906 | 108,979 | 9470555   | European |
|                           | ebi-a-GCST006465          | 2018 | Endometrial cancer (endometrioid histology)     | NA         | 54884   | 8,758  | 46,126  | 9464330   | European |
|                           | ebi-a-GCST006466          | 2018 | Endometrial cancer (Non-endometrioid histology) | NA         | 36677   | 1,230  | 35,447  | 8974630   | European |
